# Supplementary material for: Extra-binomial variation approach for analysis of pooled DNA sequencing data
Source: PubMed Central journal article supplement (PMC3496343; doi:10.1093/bioinformatics/bts553), 2012-09-12
Supplement: supp_bts553_suppl.pdf [file supp_bts553_suppl.pdf]

## Supplementary Material to extra-binomial variation approach for analysis of pooled DNA sequencing data

Xin Yang<sup>1</sup>, John A. Todd<sup>1</sup>, David Clayton<sup>1</sup> and Chris Wallace<sup>1\*</sup>

<sup>1</sup>Juvenile Diabetes Research Foundation/Wellcome Trust Diabetes and Inflammation Laboratory,  
Department of Medical Genetics, Cambridge Institute for Medical Research, University of  
Cambridge, Wellcome Trust/MRC Building, Addenbrooke's Hospital, Cambridge CB2 0XY, UK

Received on XXXXX; revised on XXXXX; accepted on XXXXX

Associate Editor: XXXXXXXX

---

---

\*to whom correspondence should be addressed

## A BINOMIAL VARIATION MODEL

The conditional distribution of the major allele count  $R_{ij}$  in the  $i$ th SNP and the  $j$ th pool is assumed to be binomial given the observed depth  $D_{ij}$  (the total counts of both alleles for one SNP) and allele frequency (proportion of response)  $p_{ij}$ , such as

$$Pr(R_{ij} = x_{ij} | D_{ij}, p_{ij}) = \binom{D_{ij}}{x_{ij}} p_{ij}^{x_{ij}} (1 - p_{ij})^{D_{ij} - x_{ij}} \quad (1)$$

for observed allele counts  $x_{ij} = 0, 1, \dots, D_{ij}$ . It is further assumed that the expected  $p_{ij}$  within the same treatment group is the same. Under these assumptions, for SNP  $i$  within the same treatment group,

$$E(p_{ij}) = \theta_i \quad (2)$$

$$\text{Var}(p_{ij}) = \theta_i(1 - \theta_i) \quad (3)$$

Therefore, we used  $\bar{p}_i$  the arithmetic mean of  $\hat{p}_{ij}$  ( $\hat{p}_{ij} = x_{ij}/D_{ij}$ ) to estimate  $\theta_i$ . Noticeably,  $\bar{p}_i$  involves no weighting of the  $p_{ij}$  by depth, which might not be appropriate when the variance of depth across pools is considerably large.

## B PARAMETER ESTIMATING IN WILLIAMS' EXTRA-BINOMIAL VARIATION MODEL

Under the assumptions of this model mentioned in the main text, to estimate allele frequency  $\theta_i$ , we suppose

$$\lambda_i = \ln \left( \frac{\theta_i}{1 - \theta_i} \right)$$

and  $\lambda_i$  fits the logistic linear model where

$$\lambda_i = \beta_0 x + \beta_1 (1 - x) \quad x = \begin{cases} 1, & \text{control} \\ 0, & \text{case} \end{cases} \quad (4)$$

The parameters involved in this model were estimated in the following iterative procedure proposed by Williams in 1982 when he programmed in GLIM (Williams, 1982) and now programmed in R in our paper.

## C REGRESSION IN MODIFIED EXTRA-BINOMIAL MODEL

Equation 9 in the main document is derived in this way:

$$\begin{aligned} E(r_{ij}^2) &= E \left[ \frac{n}{n-1} \frac{1}{\hat{\theta}_i(1-\hat{\theta}_i)} \left( \frac{R_{ij}}{D_{ij}} - \hat{\theta}_i \right)^2 \right] \\ &= \frac{1}{\hat{\theta}_i(1-\hat{\theta}_i)} E \left[ \frac{n}{n-1} \left( \frac{R_{ij}}{D_{ij}} - \hat{\theta}_i \right)^2 \right] \\ &= \frac{1}{\theta_i(1-\theta_i)} \text{Var}(R_{ij}/D_{ij}) \\ &= \frac{1}{\theta_i(1-\theta_i)} \theta_i(1-\theta_i) D_{ij}'^{-1} \\ &= D_{ij}'^{-1} = \frac{a}{s} + \frac{b}{D_{ij}} \end{aligned} \quad (5)$$

Linear regression of  $r_{ij}^2$  on  $1/D_{ij}$  for estimating the parameters  $a$  and  $b$  involved in the model was carried out using generalised linear model (GLM) by first adopting Gaussian errors to estimate initial values of  $a$  and  $b$ , and then using these to fit a GLM with gamma errors and identity link because both  $a$  and  $b$  are positive.

Since the estimated allele frequency  $\hat{\theta}_i$  depends on  $a$  and  $b$ , the calculations were carried out iteratively until the difference to the previous run converged to no more than  $10^{-3}$ .

The regression yields  $a = 0.40$ ,  $b = 13.66$  for all SNPs after initial filtering and  $a = 0.59$ ,  $b = 1.27$  for dbSNPs .

## D SUPPLEMENTARY FIGURE

### REFERENCES

Williams, D. (1982). Extra-binomial variation in logistic linear models. *Journal of the Royal Statistical Society. Series C (Applied Statistics)*, **31**, 144–148.

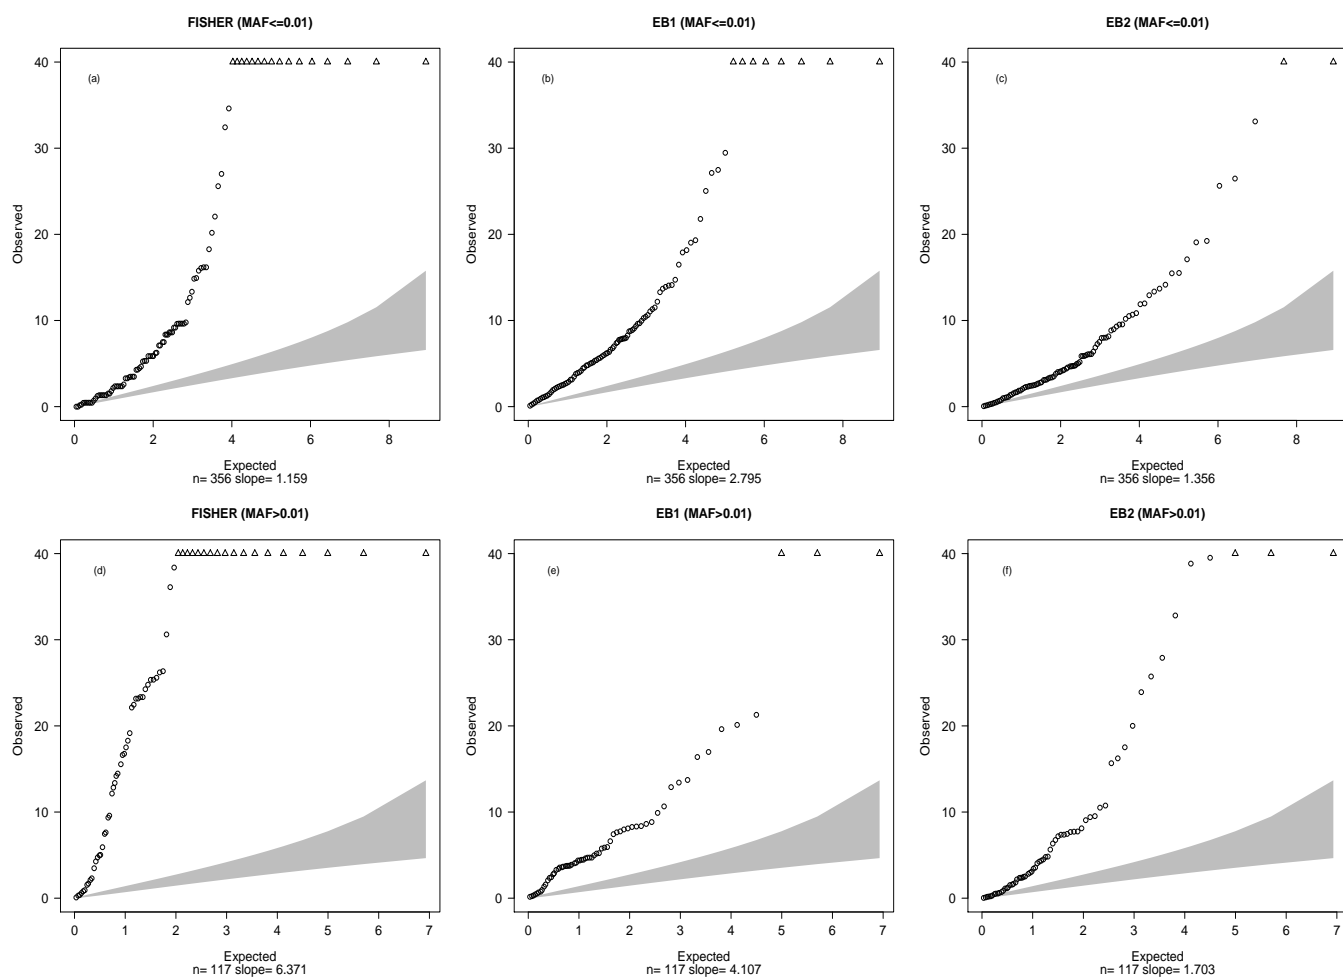

**Fig. 1.** SNPs were grouped according to minor allele frequencies (MAF) and three methods: Fisher's exact test, EB1 and EB2 were performed to each group. In our data, there were 356 rare SNPs with MAF less than 0.01 and 117 common SNPs with MAF greater than 0.01. Q-Q plots were drawn to compare the performances of these three methods on rare and common variants.

**Table 1.** Sequencing error rates estimated from our experimental data (see method in the main text).  $\varepsilon_{a,a'}$  denotes the error rate that a reference allele  $a$  is miscalled as allele  $a'$ .

| Error type          | Error rate ( $\times 10^{-5}$ ) |
|---------------------|---------------------------------|
| $\varepsilon_{A,T}$ | 2.71                            |
| $\varepsilon_{A,G}$ | 3.57                            |
| $\varepsilon_{A,C}$ | 2.36                            |
| $\varepsilon_{T,A}$ | 2.61                            |
| $\varepsilon_{T,G}$ | 2.11                            |
| $\varepsilon_{T,C}$ | 4.13                            |
| $\varepsilon_{G,T}$ | 3.70                            |
| $\varepsilon_{G,A}$ | 10.63                           |
| $\varepsilon_{G,C}$ | 1.37                            |
| $\varepsilon_{C,T}$ | 10.59                           |
| $\varepsilon_{C,G}$ | 1.16                            |
| $\varepsilon_{C,A}$ | 3.44                            |
